# Supplementary material
Source: Springer Nature journal article supplement (https://www.springermedizin.de/resource/supplementary/12885_2012_3342_MOESM11_ESM.pdf/9463276)

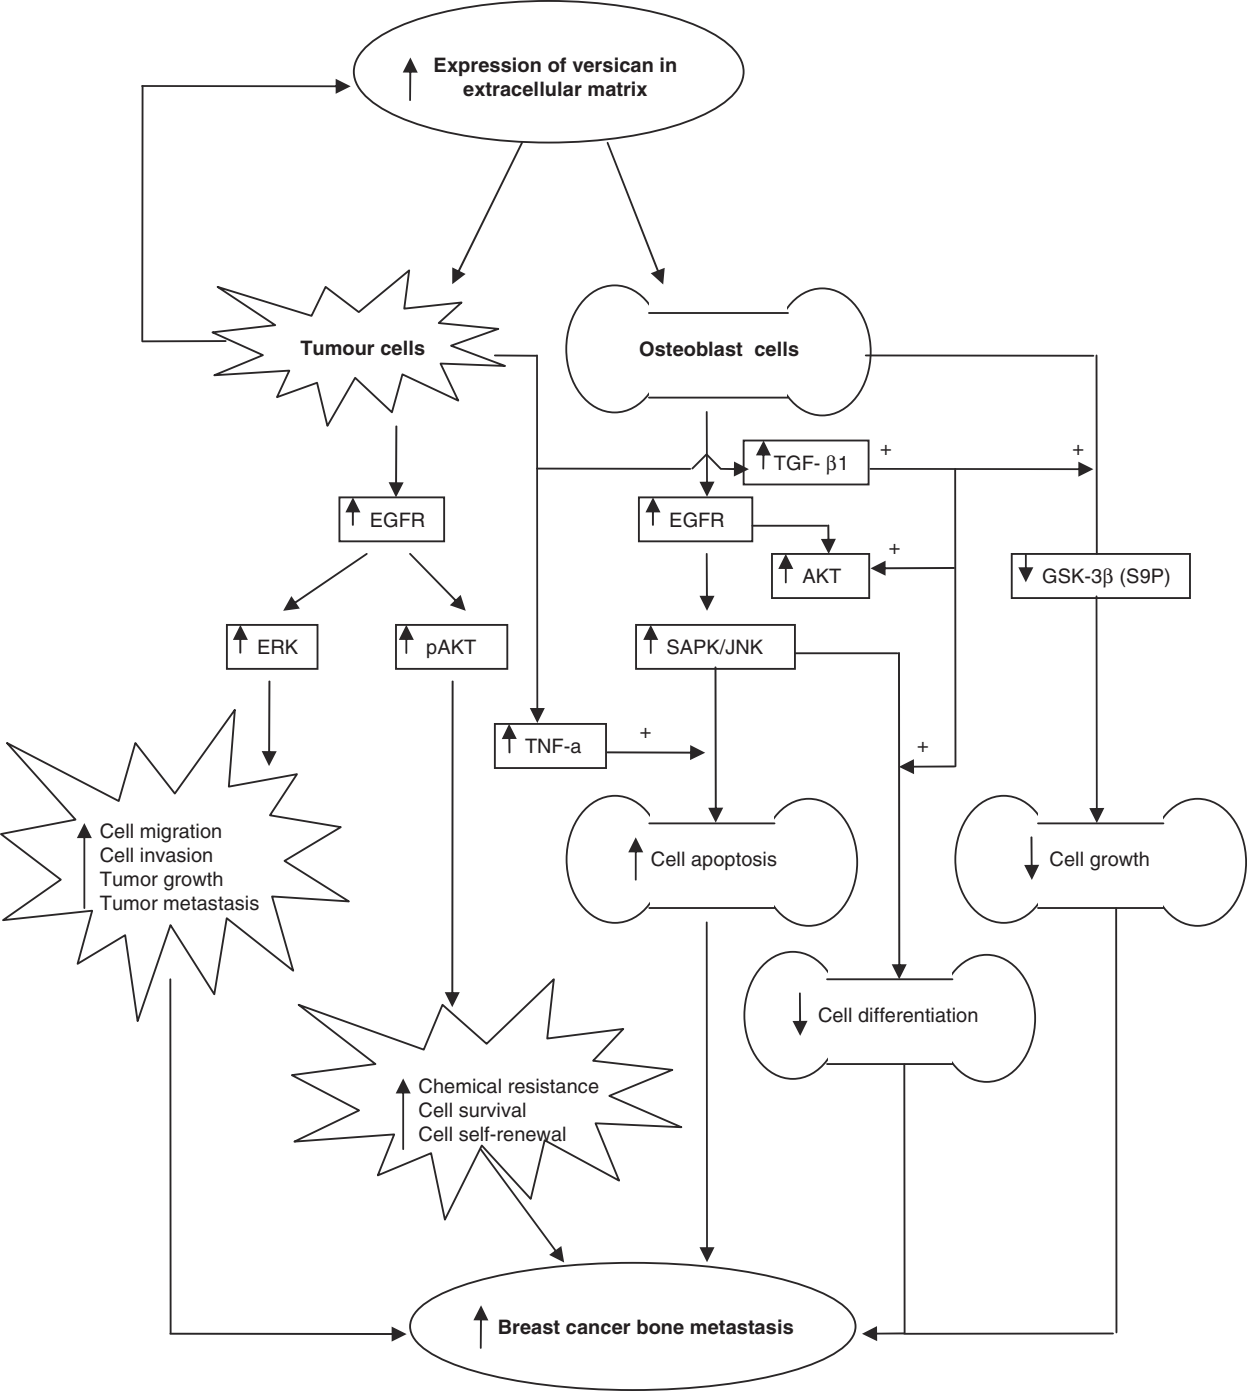

Supplement: MOESM11 [file 9463276]
